# Supplementary material for: Physicochemical properties of pore residues predict activation gating of CaV1.2: A correlation mutation analysis
Source: PubMed Central journal article supplement — Pflugers Arch. 2010 Oct 7;461(1):53–63. doi: 10.1007/s00424-010-0885-2 (PMC3016219; doi:10.1007/s00424-010-0885-2), 2010-10-07
Supplement: 424_2010_885_MOESM1_ESM.pdf [file 424_2010_885_MOESM1_ESM.pdf]

## Supplementary material

### Supplementary Table 1. Amino acid descriptors

List of descriptors and their abbreviations used for correlation analysis.

| Descriptors                                                                                                                                                                           | Abbreviation                       |
|---------------------------------------------------------------------------------------------------------------------------------------------------------------------------------------|------------------------------------|
| Number of atoms (including implicit hydrogens).                                                                                                                                       | a_count                            |
| Number of heavy atoms                                                                                                                                                                 | a_heavy                            |
| Number of hydrophobic atoms                                                                                                                                                           | a_hyd                              |
| Water accessible surface area calculated using a radius of 1.4 Å for the water molecule                                                                                               | ASA                                |
| Water accessible surface area of all polar atoms. Accessible surface area refers to the water accessible surface area using a probe radius of 1.4 Å                                   | ASA_P                              |
| Number of bonds (including implicit hydrogens).                                                                                                                                       | b_count                            |
| Number of rotatable bonds. Topological parameter is a measure of molecular flexibility. A bond is rotatable if it has order 1, is not in a ring, and has at least two heavy neighbors | b_rotN                             |
| Hydropathy index of an amino acid (number representing the hydrophobic or hydrophilic properties of its side-chain)                                                                   | <b>Hydrophobicity</b> <sup>a</sup> |
| Turn propensity scale for transmembrane helices                                                                                                                                       | Helix turn propensity <sup>b</sup> |
| The number of O and N atoms                                                                                                                                                           | lip_acc                            |
| The number of OH and NH atoms                                                                                                                                                         | lip_don                            |
| Log of the octanol/water partition coefficient                                                                                                                                        | logP(o/w)                          |
| Amino acid side chain flexibility                                                                                                                                                     | t-Flx <sup>c</sup>                 |
| Amino acid side chain rigidity                                                                                                                                                        | t-Rig <sup>c</sup>                 |
| Area of van der Waals surface                                                                                                                                                         | vdw_area                           |
| van der Waals volume                                                                                                                                                                  | vdw_vol                            |
| Molecular weight.                                                                                                                                                                     | weight                             |

<sup>a</sup> Kyte and Doolittle (1982)

<sup>b</sup> Monne et al. (1999)

<sup>c</sup> Gottfries and Eriksson (2009)

**Supplementary Table 2. Calculated amino acid descriptors**

Calculated values of descriptors for each amino acid

| Amino acid | a_count | a_heavy | a_hyd | ASA, Å <sup>2</sup> | ASA_P, Å <sup>2</sup> | b_count |
|------------|---------|---------|-------|---------------------|-----------------------|---------|
| A          | 13      | 6       | 2     | 242.74324           | 0                     | 12      |
| C          | 14      | 7       | 2     | 273.85648           | 224.60548             | 13      |
| D          | 15      | 9       | 2     | 278.12979           | 225.49535             | 14      |
| E          | 18      | 10      | 3     | 313.17535           | 235.8358              | 17      |
| F          | 23      | 12      | 8     | 360.759             | 135.49438             | 23      |
| G          | 10      | 5       | 1     | 217.82974           | 0                     | 9       |
| H          | 20      | 11      | 4     | 332.29614           | 208.60524             | 20      |
| I          | 22      | 9       | 5     | 310.68332           | 143.2991              | 21      |
| K          | 25      | 10      | 5     | 361.34518           | 217.77553             | 24      |
| L          | 22      | 9       | 5     | 322.46146           | 181.95142             | 21      |
| M          | 20      | 9       | 5     | 337.17654           | 184.87408             | 19      |
| N          | 17      | 9       | 2     | 291.38504           | 247.48032             | 16      |
| P          | 17      | 8       | 4     | 279.61813           | 86.08024              | 17      |
| Q          | 20      | 10      | 3     | 323.83051           | 249.88791             | 19      |
| R          | 27      | 12      | 4     | 389.96347           | 291.78641             | 26      |
| S          | 14      | 7       | 2     | 259.00809           | 200.8197              | 13      |
| T          | 17      | 8       | 3     | 280.57605           | 180.75769             | 16      |
| V          | 19      | 8       | 4     | 289.1181            | 170.4135              | 18      |
| W          | 27      | 15      | 10    | 393.14545           | 202.4926              | 28      |
| Y          | 24      | 13      | 8     | 372.37411           | 232.85223             | 24      |

| Amino acid | b_rotN | lip_acc | lip_don | logP(o/w) | vdw_area, Å <sup>2</sup> | vdw_vol, Å <sup>3</sup> |
|------------|--------|---------|---------|-----------|--------------------------|-------------------------|
| A          | 1      | 3       | 1       | -0.538    | 107.75999                | 111.04782               |
| C          | 2      | 3       | 1       | -0.428    | 129.56839                | 132.36894               |
| D          | 3      | 5       | 1       | -1.165    | 135.29059                | 140.78549               |
| E          | 4      | 5       | 1       | -0.723    | 152.52267                | 165.21468               |
| F          | 3      | 3       | 1       | 0.997     | 178.25824                | 226.02168               |
| G          | 1      | 3       | 1       | -1        | 90.52791                 | 86.61864                |
| H          | 3      | 5       | 2       | -1.307    | 161.0999                 | 190.2766                |
| I          | 3      | 3       | 1       | 0.876     | 160.8013                 | 184.33536               |
| K          | 5      | 4       | 2       | -0.469    | 176.59799                | 202.89105               |
| L          | 3      | 3       | 1       | 0.876     | 160.8013                 | 184.33536               |
| M          | 4      | 3       | 1       | 0.117     | 165.9369                 | 182.28906               |
| N          | 3      | 5       | 2       | -2.02     | 143.85384                | 151.32716               |
| P          | 1      | 3       | 1       | 0.178     | 122.67898                | 147.62587               |
| Q          | 4      | 5       | 2       | -1.578    | 161.08592                | 175.75635               |
| R          | 5      | 6       | 4       | -0.542    | 204.6192                 | 227.01431               |
| S          | 2      | 4       | 2       | -1.573    | 117.78994                | 119.57003               |
| T          | 2      | 4       | 2       | -1.111    | 135.02202                | 143.99921               |
| V          | 2      | 3       | 1       | 0.434     | 143.56921                | 159.90617               |
| W          | 3      | 4       | 2       | 1.363     | 200.41324                | 271.36938               |
| Y          | 3      | 4       | 2       | 0.689     | 188.28818                | 234.5439                |

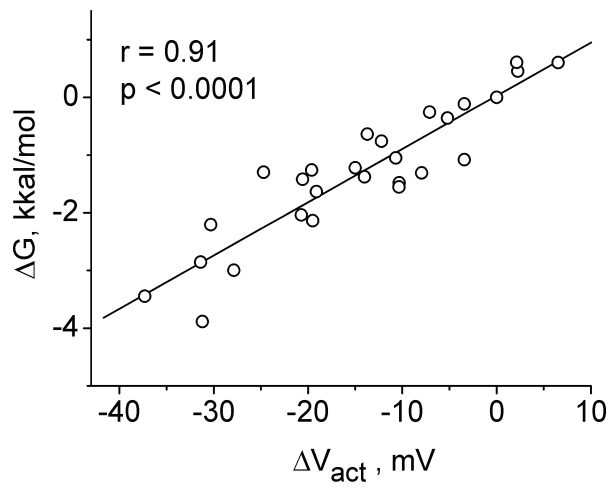

**Supplementary Fig. 1 Correlation between  $\Delta V_{act}$  and changes in free energy ( $\Delta G$ )**

Each point represents the mean value of  $\Delta V_{act}$  and  $\Delta G$  ( $n \geq 5$ ) of all studied mutants.
